# Supplementary material for: Renin–Angiotensin System Blockers and Adverse Outcomes of Influenza and Pneumonia: A Danish Cohort Study
Source: PubMed Central journal article supplement — J Am Heart Assoc. 2020 Oct 1;9(19):e017297. doi: 10.1161/JAHA.120.017297 (PMC7792378; doi:10.1161/jaha.120.017297), 2020-10-01

# **SUPPLEMENTAL MATERIAL**

**Table S1. Codes.**

| <b>Variable</b>                                         | <b>Source/format</b> | <b>Look-back</b> | <b>Inclusion codes</b>                                                         | <b>Exclusion codes</b> |
|---------------------------------------------------------|----------------------|------------------|--------------------------------------------------------------------------------|------------------------|
| <b>Study population (ICD-10 codes)</b>                  |                      |                  |                                                                                |                        |
| Any influenza or pneumonia                              | DNPR/ICD-10          |                  | J09-J18, A481, B012, A709                                                      |                        |
| Influenza                                               | DNPR/ICD-10          |                  | J09, J10                                                                       |                        |
| Pneumonia with bacterial or unspecified pathogen        | DNPR/ICD-10          |                  | J13, J14, J157, J159, J180, J181, J182, J189, A481                             |                        |
| <b>Main exposures (ATC codes)</b>                       |                      |                  |                                                                                |                        |
| ACE-Is                                                  | NPD/ATC              | 90d              | C09A, C09B                                                                     |                        |
| ARBs                                                    | NPD/ATC              | 90d              | C09C, C09D                                                                     |                        |
| Calcium channel blockers (CCB)                          | NPD/ATC              | 90d              | C07FB, C08CA, C09BB, C09DB, C09DX01                                            |                        |
| <b>Outcomes</b>                                         |                      |                  |                                                                                |                        |
| ICU admission                                           | DNPR/Procedure       |                  | NABE, NABB                                                                     |                        |
| Mechanical ventilation                                  | DNPR/Procedure       |                  | BGDA0                                                                          |                        |
| Non-invasive ventilation                                | DNPR/Procedure       |                  | BGDA1                                                                          |                        |
| Treatment with inotropes/vasopressors                   | DNPR/Procedure       |                  | BFHC92A, BFHC92B, BFHC92C, BFHC92D, BFHC92E, BFHC93A, BFHC93B, BFHC93C, BFHC95 |                        |
| Dialysis-treated acute kidney injury (“acute dialysis”) | DNPR/Procedure       |                  | BJFD0                                                                          |                        |
| Death                                                   | CPR/status           |                  |                                                                                |                        |
| <b>Covariates</b>                                       |                      |                  |                                                                                |                        |
| Age                                                     | CPR                  |                  |                                                                                |                        |
| Sex                                                     | CPR                  |                  |                                                                                |                        |
| <b>Coexisting conditions</b>                            |                      |                  |                                                                                |                        |
| Hospital-diagnosed hypertension                         | DNPR/ICD-10          | 10y              | I10, I15                                                                       |                        |
| Diagnosed stable angina pectoris                        | DNPR/ICD-10          | 10y              | I20, I251, I259                                                                | I21, I22, I23, I200    |
| Myocardial infarction                                   | DNPR/ICD-10          | 10y              | I21, I22, I23                                                                  |                        |
| Heart failure                                           | DNPR/ICD-10          | 10y              | I50                                                                            |                        |
| Stroke                                                  | DNPR/ICD-10          | 10y              | I60, I61, I63, I64                                                             |                        |
| Atrial fibrillation/flutter                             | DNPR/ICD-10          | 10y              | I48                                                                            |                        |
| Heart valve disease                                     | DNPR/ICD-10          | 10y              | I05, I06, I07, I08, I09.8, I34-I37, I39, I51.1A, Q22, Q23                      |                        |
| Venous thromboembolism                                  | DNPR/ICD-10          | 10y              | I26, I801, I802, I803                                                          |                        |

| Variable                                                | Source/format  | Look-back | Inclusion codes                                                                                            | Exclusion codes    |
|---------------------------------------------------------|----------------|-----------|------------------------------------------------------------------------------------------------------------|--------------------|
| Diabetes                                                | DNPR/ICD-10    | 10y       | E10, E11, E12, E13, E14, O24, G63.2, H360, N083                                                            | O24.4              |
|                                                         | NPD/ATC        | 10y       | A10A, A10B                                                                                                 |                    |
| Chronic pulmonary disease                               | DNPR/ICD-10    | 10y       | J40, J41-J44, J45-J47, J60-J67, J68.4, J70.1, J70.3, J84.1, J92.0, J96.1, J98.2, J98.3                     |                    |
| Renal disease                                           | DNPR/ICD-10    | 10y       | I12, I13, N00-N05, N07, N11, N14, N18-N19, Q61, N08, E102, E112, E142                                      |                    |
| End-stage renal disease (kidney transplant or dialysis) | DNPR/Procedure | 10y       | BJFD2                                                                                                      |                    |
|                                                         | DNPR/Surgery   | 10y       | KKAS                                                                                                       |                    |
|                                                         | DNPR/ICD-10    | 10y       | T861, Z940                                                                                                 |                    |
| Liver disease                                           | DNPR/ICD-10    | 10y       | B18, B150, B160, B162, B190, I85, K70, K71, K72, K73, K74, K760, K76.6                                     |                    |
| Dementia                                                | DNPR/ICD-10    | 10y       | DF00, DF01, DF02, DF03, DG30, DG310B, DG311, DG318, DG319                                                  |                    |
|                                                         | NPD/ATC        | 10y       | N06D                                                                                                       |                    |
| Cancer                                                  | DNPR/ICD-10    | 10y       | C00-C96, D459, D46, D471, D473, D474, D475                                                                 | C44                |
| Metastatic cancer                                       | DNPR/ICD-10    | 10y       | C76-C80, CxxxM                                                                                             |                    |
| Peptic ulcer disease                                    | DNPR/ICD-10    | 10y       | K221, K25-K28                                                                                              |                    |
| Rheumatoid arthritis or connective tissue disease       | DNPR/ICD-10    | 10y       | M05-M06, M30-M36, M45                                                                                      |                    |
| <b>Co-medication</b>                                    |                |           |                                                                                                            |                    |
| Number of antihypertensive drugs                        | NPD/ATC        | 90d       | 0-5 (see below: ACE-I/ARB, CCB, Thiazides/diuretics, BB, other antihypertensive drugs)                     |                    |
| Thiazides/diuretics                                     | NPD/ATC        | 90d       | C03AA01, C03AA03, C03AB01, C03AB03, C03AX01, C03EA, C07B, C09BA, C09DA, C09DX01, C09DX03, C09XA52, C09XA54 | C07BA06<br>C09BA04 |
| Beta-blockers (BB)                                      | NPD/ATC        | 90d       | C07                                                                                                        |                    |
| Other antihypertensive drugs                            | NPD/ATC        | 90d       | C02AC, C02CA, C03BA11, C09XA<br>C02AB01                                                                    | C09XA54            |
| Statins                                                 | NPD/ATC        | 90d       | C10AA, C10B                                                                                                |                    |
| Aspirin                                                 | NPD/ATC        | 90d       | B01AC06, N02BA01, N02BA51                                                                                  |                    |
| Loop diuretics                                          | NPD/ATC        | 90d       | C03C                                                                                                       |                    |
| Antibiotics                                             | NPD/ATC        | 10d       | J01                                                                                                        |                    |
| Antivirals                                              | NPD/ATC        | 10d       | J05                                                                                                        |                    |

| Variable                                                                                                   | Source/format | Look-back | Inclusion codes                                                                                | Exclusion codes |
|------------------------------------------------------------------------------------------------------------|---------------|-----------|------------------------------------------------------------------------------------------------|-----------------|
| Immunosuppressants                                                                                         | NPD/ATC       | 90d       | L04                                                                                            |                 |
| Glucocorticoids                                                                                            | NPD/ATC       | 90d       | H02AB                                                                                          |                 |
| NSAID use                                                                                                  | NPD/ATC       | 90d       | M01A                                                                                           |                 |
| Opioid use                                                                                                 | NPD/ATC       | 90d       | N02A, N07BC02                                                                                  |                 |
| Vitamin K antagonists                                                                                      | NPD/ATC       | 90d       | B01AA                                                                                          |                 |
| Proton pump inhibitors                                                                                     | NPD/ATC       | 90d       | A02BC                                                                                          |                 |
| Antidepressants                                                                                            | NPD/ATC       | 90d       | N06A                                                                                           |                 |
| Hypnotics/sedatives                                                                                        | NPD/ATC       | 90d       | N05C                                                                                           |                 |
| Antipsychotics                                                                                             | NPD/ATC       | 90d       | N05A                                                                                           |                 |
| <b>Lifestyle and social factors</b>                                                                        |               |           |                                                                                                |                 |
| Markers of smoking (diagnoses or medications for tobacco smoking or chronic obstructive pulmonary disease) | DNPR/ICD-10   | 10y       | J41-J44, DF17, DZ716, DZ720                                                                    |                 |
|                                                                                                            | NPD/ATC       | 10y       | R03, N07BA                                                                                     |                 |
| Obesity diagnoses or medications                                                                           | DNPR/ICD-10   | 10y       | E66                                                                                            |                 |
|                                                                                                            | NPD/ATC       | 10y       | A08                                                                                            |                 |
| Alcoholism-related diagnoses or medication for alcohol deterrent                                           | DNPR/ICD-10   | 10y       | DF10, DE244, DG312, DG621, DG721, DI426, DK292, DK70, DK852, DK860, DQ860, DZ502, DZ714, DZ721 | F100            |
|                                                                                                            | NPD/ATC       | 10y       | V03AA, N07BB                                                                                   |                 |
| Marital status (widow, divorced, married, unmarried)                                                       | CPR           |           |                                                                                                |                 |
| Rural/urban place of residence                                                                             | CPR           |           |                                                                                                |                 |

ATC Anatomical Therapeutic Chemical Classification System; CPR Danish Civil Registration System; DNPR Danish National Patient Registry; ICD-10 International Classification of Diseases 10<sup>th</sup> edition; NPD National Prescription Database.

**Table S2. Characteristics all influenza/pneumonia patients, overall and by main outcomes.**

|                                                      | <i>Death within 30 days</i> | <i>ICU admission</i> | <i>Overall study population</i> |
|------------------------------------------------------|-----------------------------|----------------------|---------------------------------|
| Number of patients                                   | 76 762 (100.0)              | 42 827 (100.0)       | 568 019 (100.0)                 |
| Age, median (Q1–Q3)                                  | 81.7 (73.0–88.0)            | 70.4 (60.4–78.7)     | 73.4 (60.5–82.9)                |
| Male                                                 | 41 696 (54.3)               | 24 945 (58.2)        | 290 847 (51.2)                  |
| <b>Coexisting conditions (within prior 10 years)</b> |                             |                      |                                 |
| Hospital-diagnosed hypertension                      | 26 779 (34.9)               | 13 096 (30.6)        | 168 929 (29.7)                  |
| Previous myocardial infarction                       | 6 650 (8.7)                 | 3 225 (7.5)          | 39 765 (7.0)                    |
| Diagnosis of stable angina pectoris                  | 10 512 (13.7)               | 4 932 (11.5)         | 68 458 (12.1)                   |
| Heart failure                                        | 13 714 (17.9)               | 5 745 (13.4)         | 71 110 (12.5)                   |
| Stroke                                               | 13 312 (17.3)               | 4 745 (11.1)         | 65 390 (11.5)                   |
| Atrial fibrillation/flutter                          | 18 205 (23.7)               | 6 782 (15.8)         | 95 028 (16.7)                   |
| Heart valve disease                                  | 6 330 (8.2)                 | 2 775 (6.5)          | 34 773 (6.1)                    |
| Venous thromboembolism                               | 4 475 (5.8)                 | 2 028 (4.7)          | 28 527 (5.0)                    |
| Diabetes                                             | 14 424 (18.8)               | 8 797 (20.5)         | 96 530 (17.0)                   |
| Chronic pulmonary disease                            | 20 574 (26.8)               | 12 982 (30.3)        | 158 700 (27.9)                  |
| Renal disease                                        | 7 039 (9.2)                 | 3 644 (8.5)          | 40 703 (7.2)                    |
| End-stage renal disease                              | 974 (1.3)                   | 778 (1.8)            | 8 866 (1.6)                     |
| Liver disease                                        | 2 489 (3.2)                 | 2 398 (5.6)          | 15 306 (2.7)                    |
| Dementia                                             | 9 755 (12.7)                | 1 226 (2.9)          | 35 086 (6.2)                    |
| Cancer                                               | 21 387 (27.9)               | 7 110 (16.6)         | 106 704 (18.8)                  |
| Metastatic cancer                                    | 5 178 (6.7)                 | 903 (2.1)            | 18 613 (3.3)                    |
| Peptic ulcer disease                                 | 6 101 (7.9)                 | 3 209 (7.5)          | 32 653 (5.7)                    |
| Rheumatoid arthritis or connective tissue disease    | 4 173 (5.4)                 | 2 260 (5.3)          | 32 740 (5.8)                    |
| <b>Co-medication (prescription within 90 days)</b>   |                             |                      |                                 |
| Total number of antihypertensive drugs               |                             |                      |                                 |
| 0                                                    | 39 555 (51.5)               | 22 989 (53.7)        | 322 012 (56.7)                  |
| 1                                                    | 21 680 (28.2)               | 9 923 (23.2)         | 130 685 (23.0)                  |
| 2                                                    | 11 318 (14.7)               | 6 659 (15.5)         | 81 190 (14.3)                   |
| 3                                                    | 3 523 (4.6)                 | 2 582 (6.0)          | 27 956 (4.9)                    |
| 4                                                    | 648 (0.8)                   | 631 (1.5)            | 5 832 (1.0)                     |
| 5                                                    | 38 (0.0)                    | 43 (0.1)             | 344 (0.1)                       |
| ACE-I                                                | 11 915 (15.5)               | 7 239 (16.9)         | 82 358 (14.5)                   |
| ARB                                                  | 6 342 (8.3)                 | 4 189 (9.8)          | 53 255 (9.4)                    |
| CCB                                                  | 10 093 (13.1)               | 6 553 (15.3)         | 71 116 (12.5)                   |
| Thiazides                                            | 11 343 (14.8)               | 6 265 (14.6)         | 79 879 (14.1)                   |
| Beta-blockers                                        | 17 332 (22.6)               | 9 050 (21.1)         | 111 315 (19.6)                  |
| Other antihypertensive drugs                         | 882 (1.1)                   | 633 (1.5)            | 6 238 (1.1)                     |
| Statins                                              | 13 882 (18.1)               | 9 271 (21.6)         | 112 995 (19.9)                  |
| Aspirin                                              | 20 813 (27.1)               | 9 308 (21.7)         | 120 295 (21.2)                  |
| Loop diuretics                                       | 26 763 (34.9)               | 10 768 (25.1)        | 127 995 (22.5)                  |
| Immunosuppressants                                   | 716 (0.9)                   | 555 (1.3)            | 6 744 (1.2)                     |
| Glucocorticoids                                      | 13 864 (18.1)               | 5 765 (13.5)         | 78 980 (13.9)                   |
| NSAID                                                | 9 173 (11.9)                | 5 957 (13.9)         | 68 602 (12.1)                   |
| Opioids                                              | 28 517 (37.1)               | 10 859 (25.4)        | 144 942 (25.5)                  |
| Vitamin K antagonists                                | 5 315 (6.9)                 | 3 044 (7.1)          | 38 277 (6.7)                    |
| Proton pump inhibitors                               | 25 845 (33.7)               | 10 954 (25.6)        | 147 542 (26.0)                  |
| Antidepressants                                      | 21 494 (28.0)               | 9 481 (22.1)         | 121 248 (21.3)                  |
| Hypnotics/sedatives                                  | 13 963 (18.2)               | 6 336 (14.8)         | 79 343 (14.0)                   |

|                                           | <i>Death within 30<br/>days</i> | <i>ICU admission</i> | <i>Overall study<br/>population</i> |
|-------------------------------------------|---------------------------------|----------------------|-------------------------------------|
| Antipsychotics                            | 7 673 (10.0)                    | 3 725 (8.7)          | 39 434 (6.9)                        |
| Antibiotics (prescription within 10 days) | 18 201 (23.7)                   | 7 442 (17.4)         | 160 059 (28.2)                      |
| Antivirals (prescription within 10 days)  | 142 (0.2)                       | 68 (0.2)             | 1 537 (0.3)                         |
| <b>Lifestyle and social factors</b>       |                                 |                      |                                     |
| Markers of smoking                        | 34 551 (45.0)                   | 21 621 (50.5)        | 279 883 (49.3)                      |
| Obesity                                   | 3 622 (4.7)                     | 3 908 (9.1)          | 44 194 (7.8)                        |
| Alcoholism                                | 6 551 (8.5)                     | 7 002 (16.3)         | 46 063 (8.1)                        |
| Marital status                            |                                 |                      |                                     |
| Widow                                     | 30 732 (40.0)                   | 9 352 (21.8)         | 153 071 (26.9)                      |
| Divorced                                  | 10 552 (13.7)                   | 7 780 (18.2)         | 85 766 (15.1)                       |
| Married                                   | 28 207 (36.7)                   | 18 398 (43.0)        | 245 727 (43.3)                      |
| Unmarried                                 | 7 271 (9.5)                     | 7 297 (17.0)         | 83 455 (14.7)                       |
| Urban residence                           | 26 494 (34.5)                   | 13 268 (31.0)        | 208 285 (36.7)                      |

Figure S1. Study design.

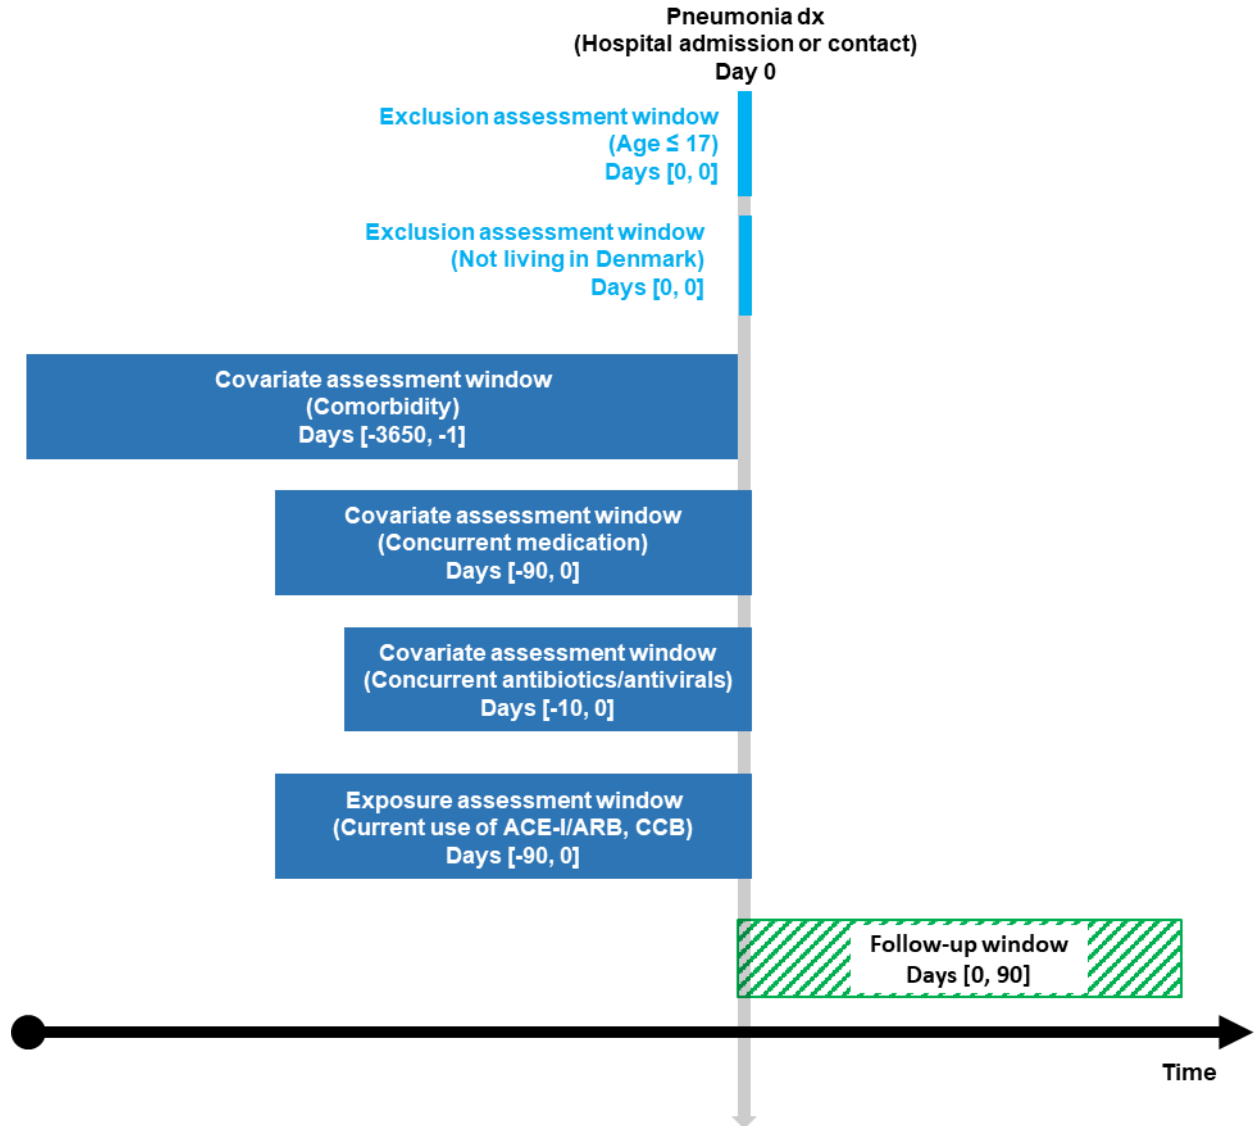

Supplement: JAH3-9-e017297-s001.pdf [file JAH3-9-e017297-s001.pdf]
